# Supplementary material for: Ag nanoparticle-decorated, ordered mesoporous silica as an efficient electrocatalyst for alkaline water oxidation reaction
Source: Royal Society of Chemistry journal article supplement (doi:10.1039/c8dt04159h), 2019-01-01
Supplement: c8dt04159h1.pdf [file c8dt04159h1.pdf]

## Supporting Information

### Ag NPs decorated ordered mesoporous silica as an efficient electrocatalyst for alkaline water oxidation reaction

Utpal Kayal,<sup>a</sup> Bishnupad Mohanty,<sup>b</sup> Piyali Bhanja,<sup>a</sup> Sauvik Chatterjee,<sup>a</sup> Debraj Chandra,<sup>c</sup>  
Michikazu Hara,<sup>d</sup> Bikash Kumar Jena<sup>\*,b</sup> and Asim Bhaumik<sup>\*,a</sup>

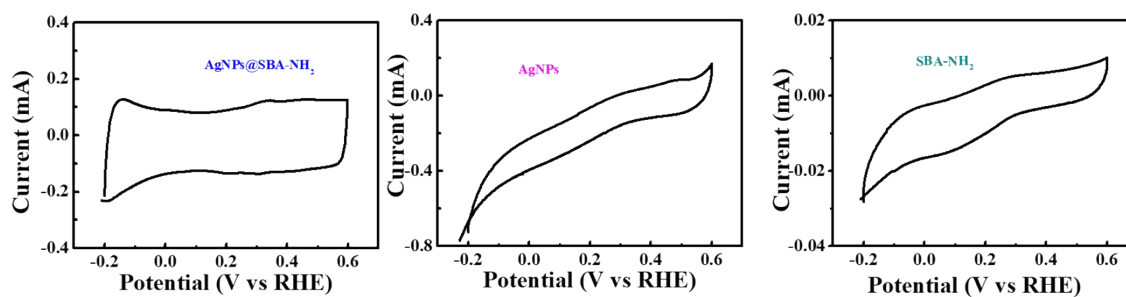

**Figure S1.** CV plots of as-synthesised AgNPs@SBA-NH<sub>2</sub>, AgNPs and SBA-NH<sub>2</sub> materials in phosphate buffer (pH = 7) at a scan rate of 50 mV/s for TOF calculations.

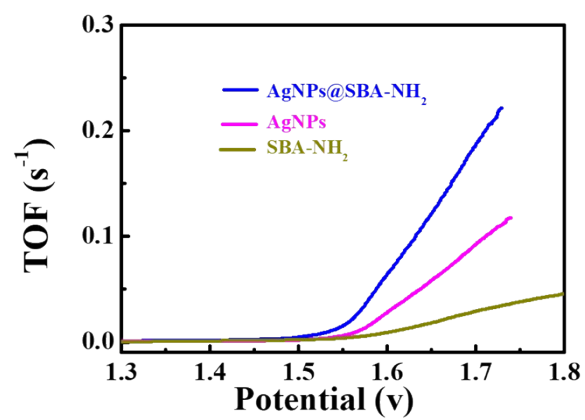

**Figure S2.** TOF plot of as-synthesised AgNPs@SBA-NH<sub>2</sub>, AgNPs and SBA-NH<sub>2</sub>.

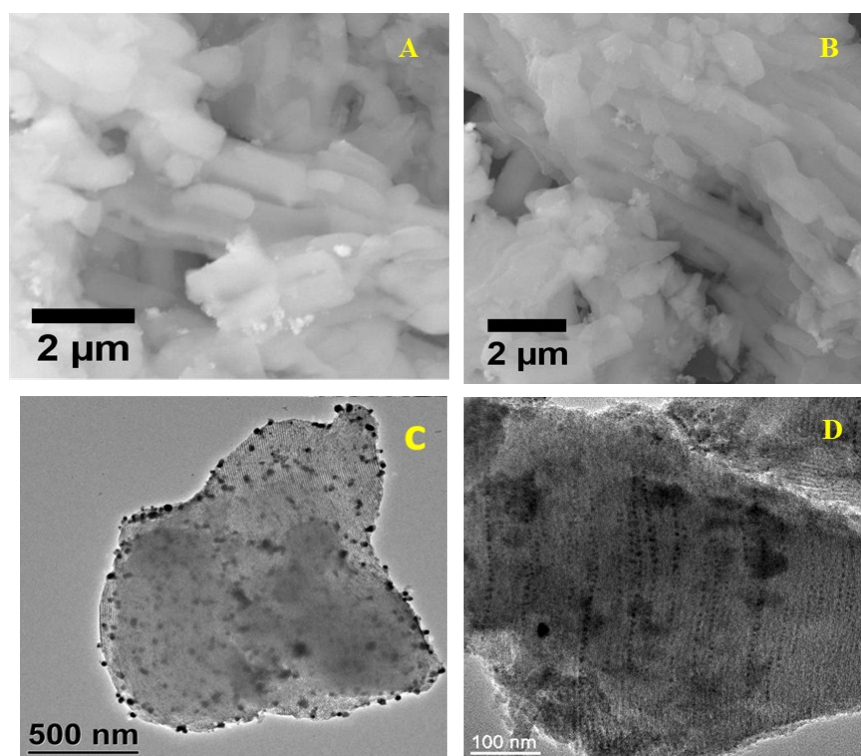

**Figure S3.** FESEM images of AgNPs@SBA-NH<sub>2</sub> before (A) and after electrocatalysis (B). TEM images of AgNPs@SBA-NH<sub>2</sub> before (C) and after electrocatalytic OER experiment (D).
